# Supplementary material for: Stereotactic Radiotherapy after Incomplete Transarterial (Chemo-) Embolization (TAE\TACE) versus Exclusive TAE or TACE for Treatment of Inoperable HCC: A Phase III Trial (NCT02323360)
Source: MDPI journal article supplement (doi:10.3390/curroncol29110692), 2022-11-16
Supplement: s1 [file s1]

# Stereotactic Radiotherapy after Incomplete Transarterial (Chemo-) Embolization (TAE\TACE) Versus Exclusive TAE or TACE for Treatment of Inoperable HCC: A Phase III Trial (NCT02323360)

Tiziana Comito <sup>1</sup>, Mauro Loi <sup>2</sup>, Ciro Franzese <sup>1,3</sup>, Elena Clerici <sup>1</sup>, Davide Franceschini <sup>1</sup>, Marco Badalamenti <sup>1</sup>, Maria Ausilia Teriaca <sup>1</sup>, Lorenza Rimassa <sup>3,4</sup>, Vittorio Pedicini <sup>5</sup>, Dario Poretti <sup>5</sup>, Luigi Alessandro Solbiati <sup>5</sup>, Guido Torzilli <sup>3,6</sup>, Roberto Ceriani <sup>7</sup>, Ana Lleo <sup>3,7</sup>, Alessio Aghemo <sup>3,7</sup>, Armando Santoro <sup>3,4</sup> and Marta Scorsetti <sup>1,3</sup>

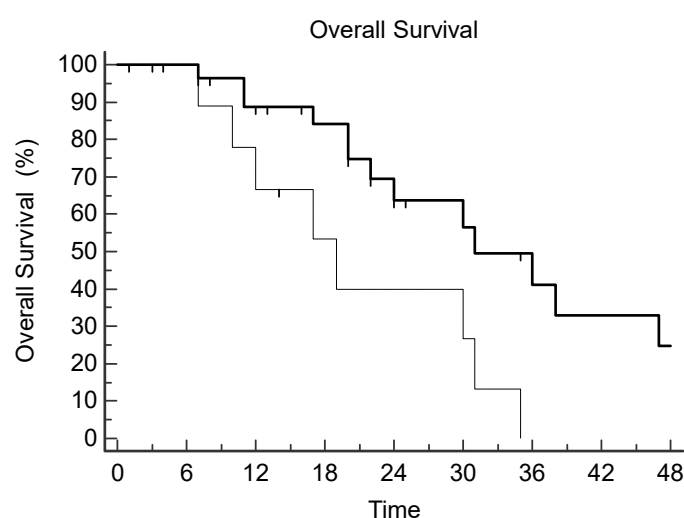

**Figure S1.** Kaplan Meier plot for Overall Survival according to use of Stereotactic Body Radiotherapy (SBRT). Solid Line: SBRT at any time point. Dashed Line: No SBRT.

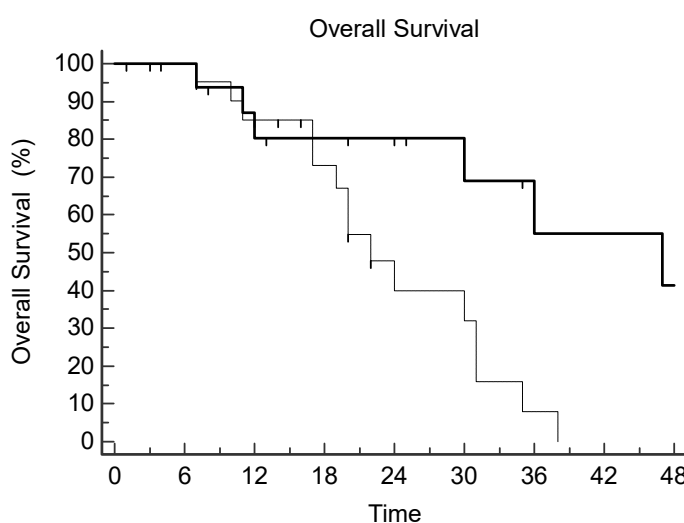

**Figure S2.** Kaplan Meier plot for Overall Survival according to prior local therapy. Solid Line: use of prior local therapy. Dashed Line: No prior local therapy.
